# Supplementary material for: The location of the thermodynamic atmosphere–ice interface in fully coupled models – a case study using JULES and CICE
Source: Copernicus journal article supplement (doi:10.5194/gmd-9-1125-2016), 2016-03-24
Supplement: Supplementary file [file gmd-9-1125-2016-supplement-title-page.pdf › gmd-9-1125-2016-supplement-title-page.pdf]

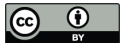

## *Supplement of*

# **The location of the thermodynamic atmosphere–ice interface in fully coupled models – a case study using JULES and CICE**

Alex E. West et al.

*Correspondence to:* Alex E. West ([alex.west@metoffice.gov.uk](mailto:alex.west@metoffice.gov.uk))

- [gmd-9-1125-2016-supplement-title-page.pdf](#)
- Paper\_code
  - Figure\_2\_3\_resolution\_experiments.pro
  - Figure\_4\_5\_coupling\_experiments.pro
  - Figure\_6\_sensitivity\_and\_parallel\_experiments.pro
  - README
  - Section\_3\_code
    - \* ice\_constants.F90
    - \* ice\_domain\_size.F90
    - \* ice\_kinds\_mod.F90
    - \* ice\_therm\_vertical.F90
    - \* make\_command
    - \* run\_ice.F90
  - ice\_constants.F90
  - ice\_constants.mod
  - ice\_coupling.F90
  - ice\_coupling.mod
  - ice\_domain\_size.F90
  - ice\_domain\_size.mod
  - ice\_kinds\_mod.F90
  - ice\_kinds\_mod.mod
  - ice\_therm\_vertical.F90
  - ice\_therm\_vertical.mod
  - make\_command\_parallel
  - make\_command\_serial

- make\_command\_stability
- ml1\_diff.pro
- ml1\_plot.pro
- ml1\_read.pro
- plot\_stability\_analysis.py
- run\_ice.F90
- run\_ice.namelist
- run\_ice\_annual.F90
- run\_ice\_parallel.F90
- run\_ice\_serial.F90
- run\_ice\_stability.F90
- run\_ice\_stability.namelist
- run\_stability\_analysis.py
- set\_ml1.pro

The copyright of individual parts of the supplement might differ from the CC-BY 3.0 licence.
